# Supplementary material for: Multiplex Screening for Interacting Compounds in Paediatric Acute Myeloid Leukaemia
Source: MDPI journal article supplement (doi:10.3390/ijms221810163), 2021-09-21
Supplement: s1 [file s1]

A

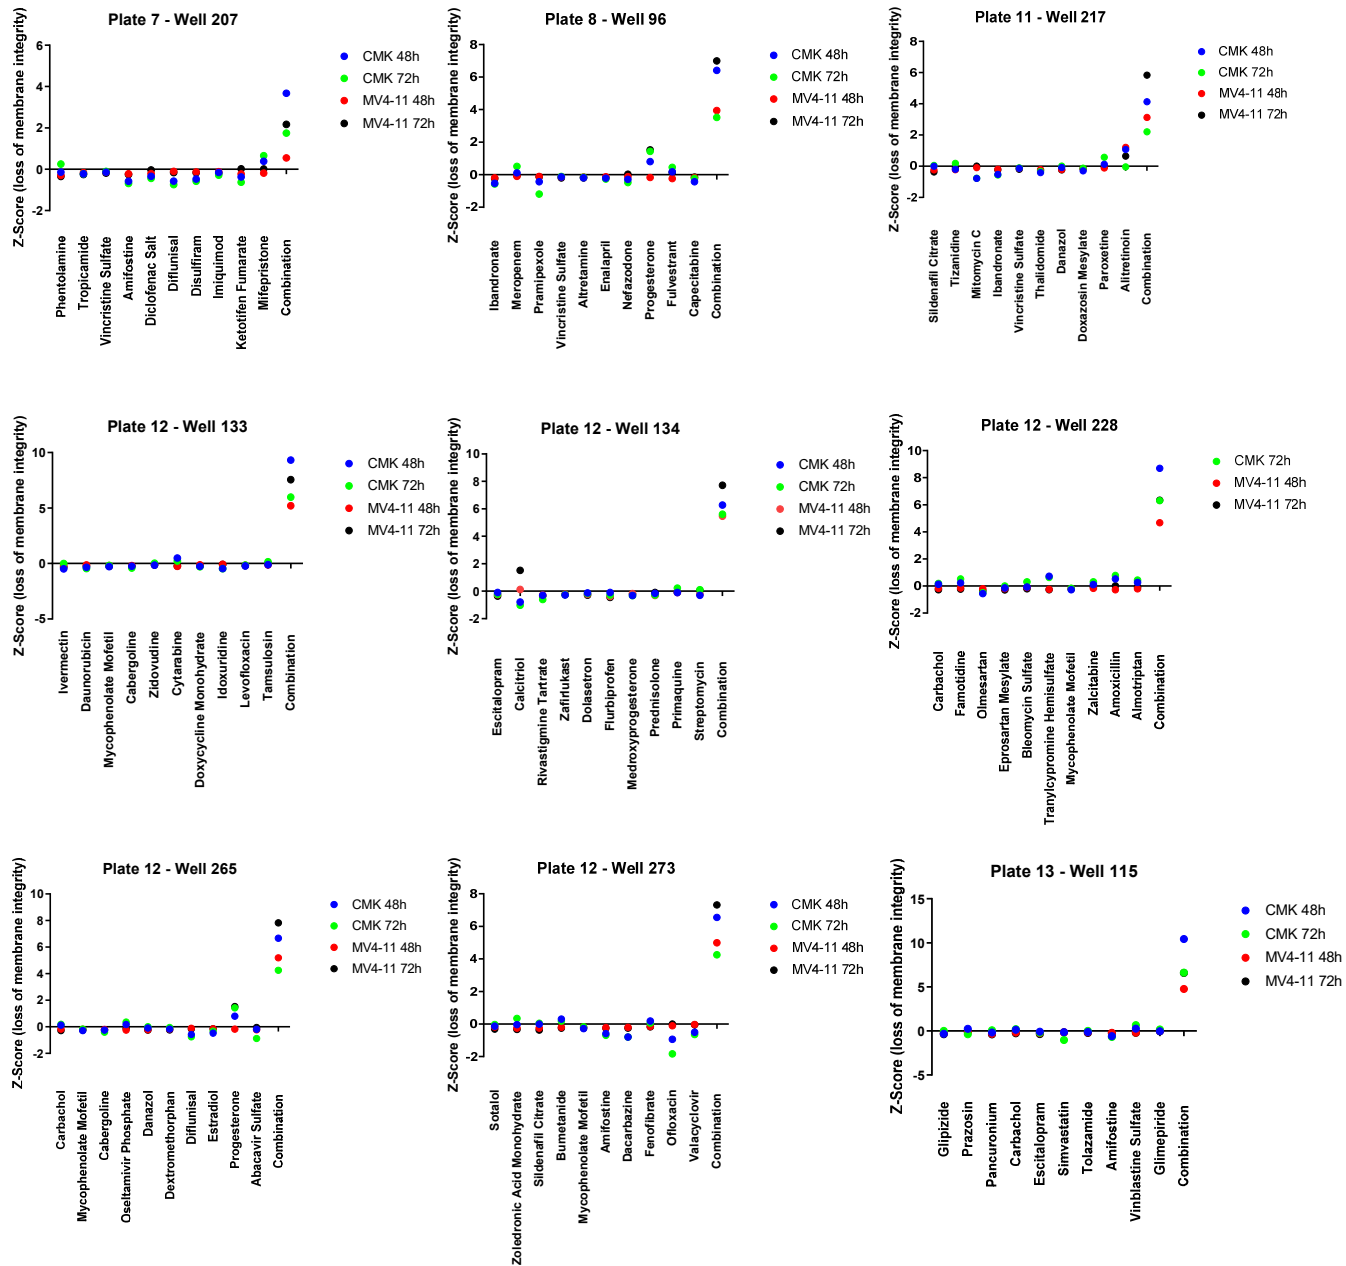

B

Graph demonstrating how often a drug appears in a hit well

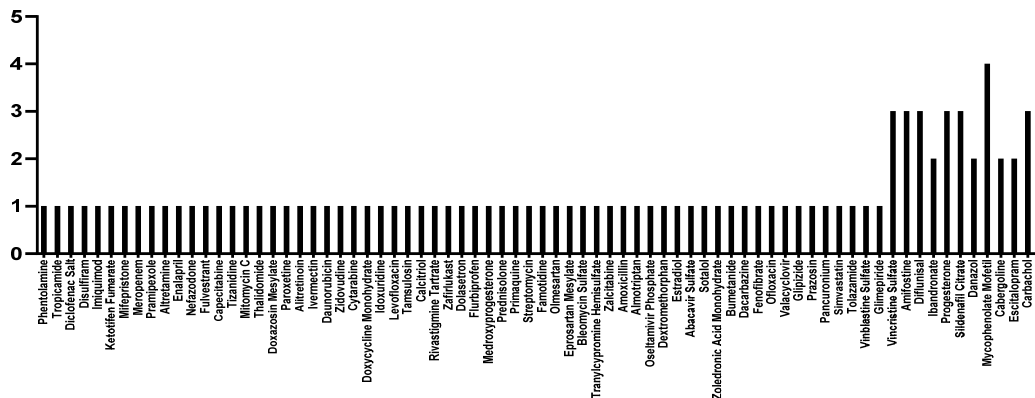

A (i)

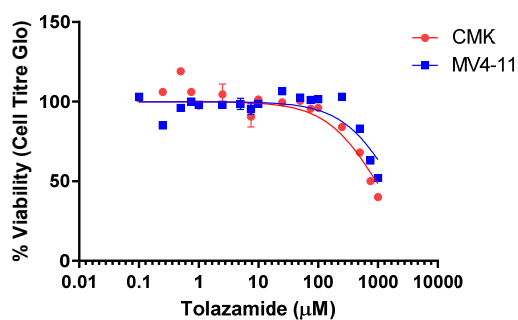

(ii)

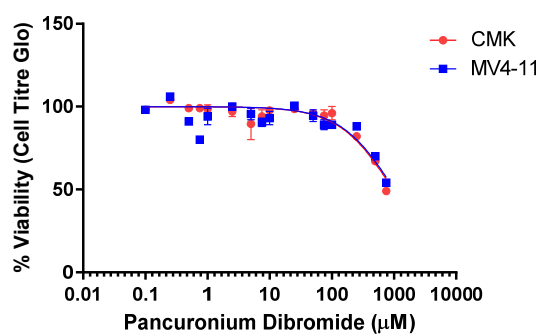

(iii)

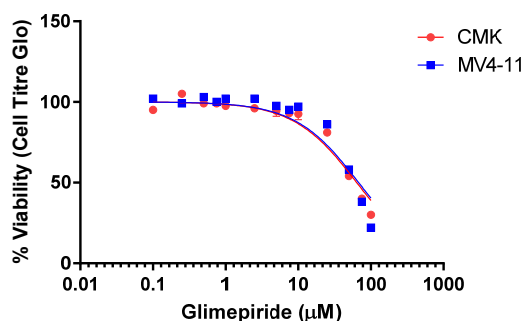

(iv)

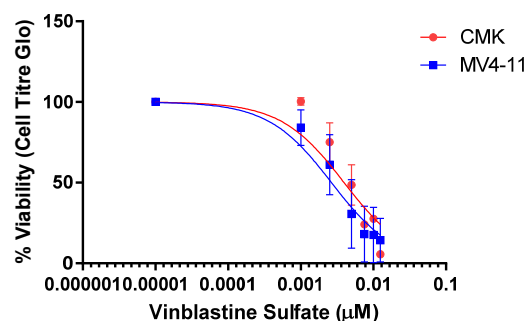

**Supplementary Table S1** – Approximate  $IC_{50}$  ( $\mu M$ ) concentrations for CMK and MV4-11 cell lines following treatment with increasing concentrations of Tolazamide, Pancuronium Dibromide, Glimepiride and Vinblastine Sulfate

| Drug Name             | CMK ( $\sim IC_{50}\mu M$ ) | MV4-11 ( $\sim IC_{50}\mu M$ ) |
|-----------------------|-----------------------------|--------------------------------|
| Tolazamide            | 937.2                       | 1748                           |
| Pancuronium Dibromide | 961.2                       | 1007                           |
| Glimepiride           | 63.84                       | 67.87                          |
| Vinblastine Sulfate   | 0.003952                    | 0.002648                       |

*Supplementary Figure S2:* Dose response curves for paediatric AML cell lines following treatment with increasing concentrations of Tolazamide, Pancuronium, Glimepiride and Vinblastine Sulfate.

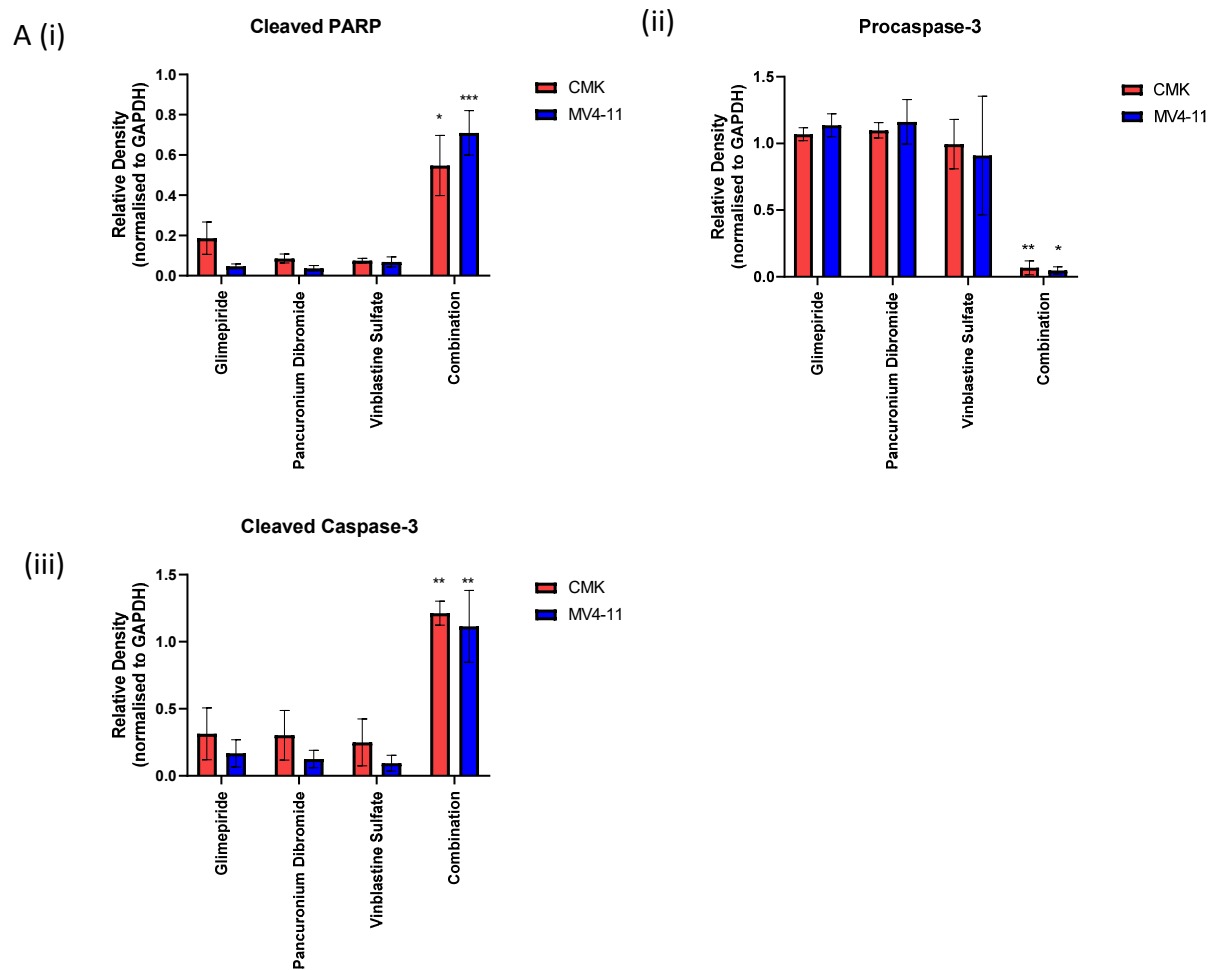

**Supplementary Figure S3:** Densitometry analysis of (i) cleaved PARP, (ii) pro-caspase-3 and (iii) cleaved caspase-3 for CMK and MV4-11 cell lines treated with Glimepiride, Pancuronium Dibromide and Vinblastine Sulfate as single agents and as a triple combination. Results are representative of three independent experiments. \* =  $P < 0.05$ , \*\* =  $P < 0.01$ , \*\*\* =  $P < 0.001$ .

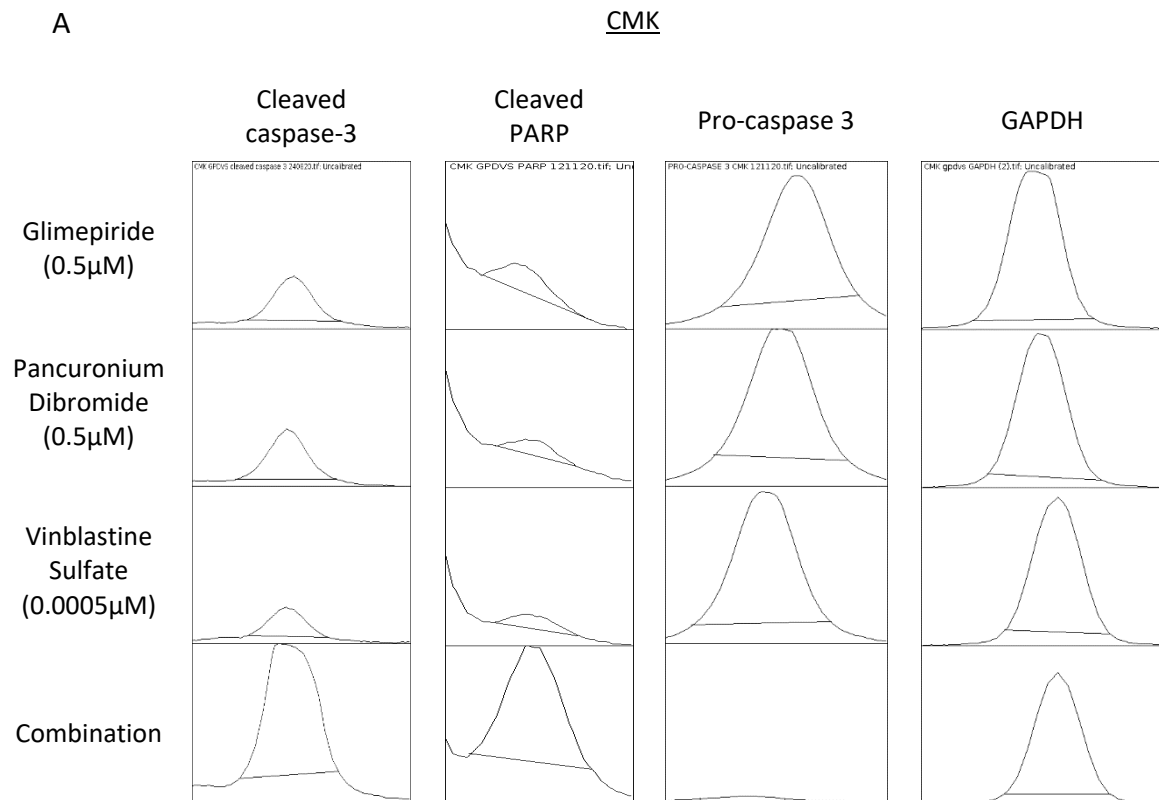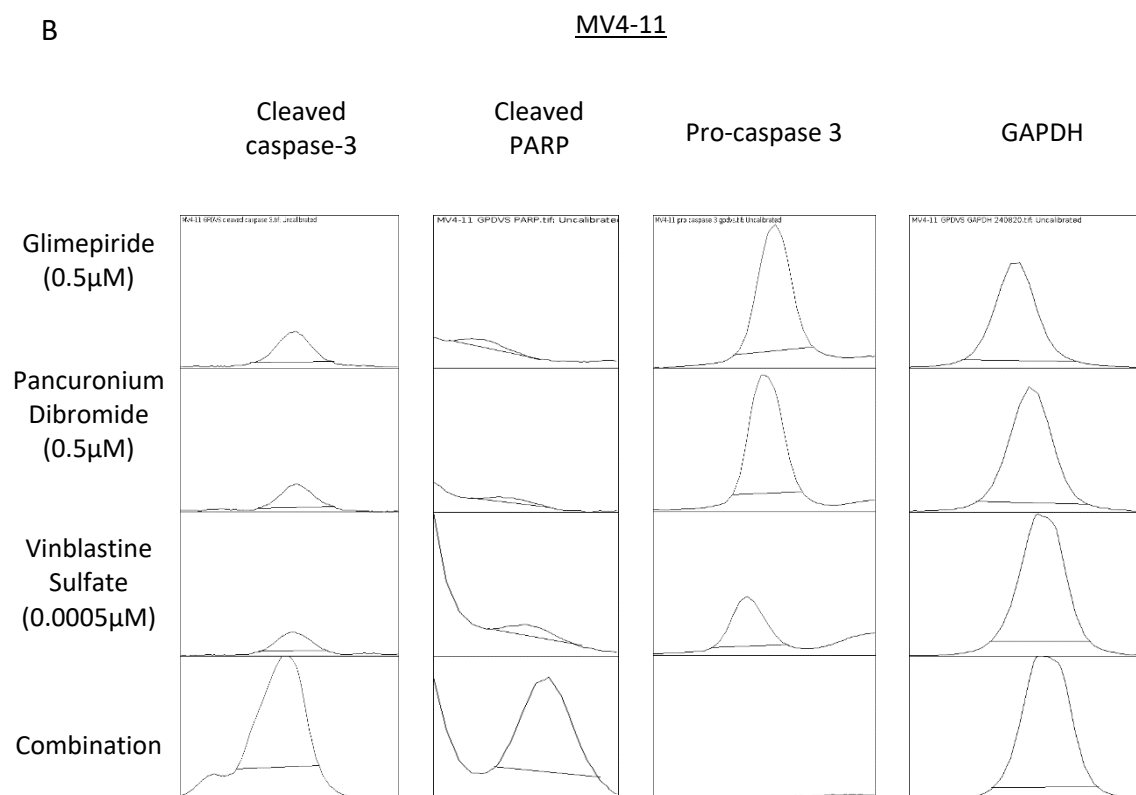

**Supplementary Figure S4:** Representative histograms from densitometry analysis. (A) CMK (B) MV4-11.

A (i)

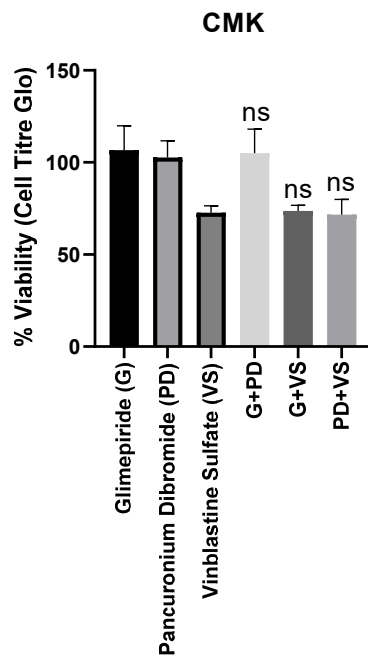

(ii)

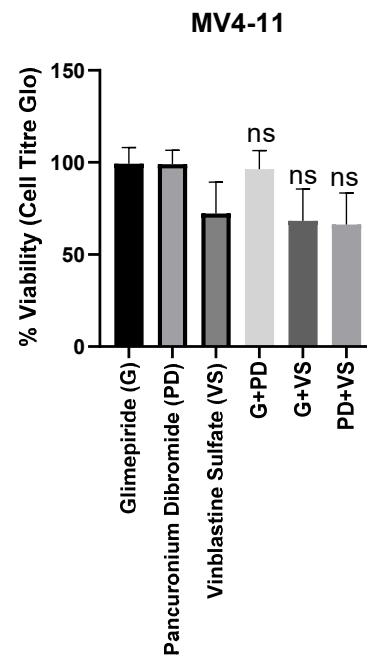

B (i)

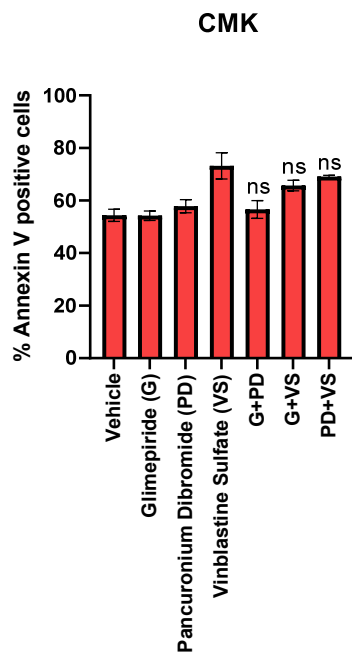

(ii)

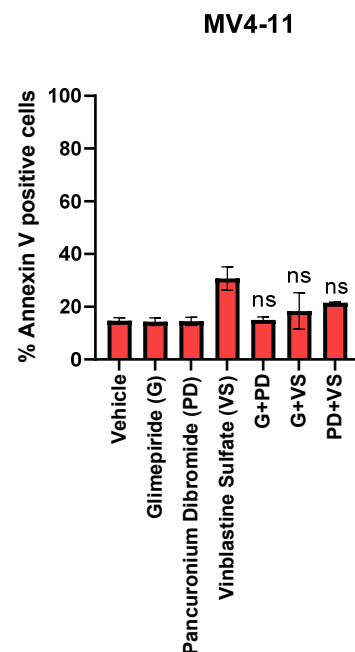

**Supplementary Figure S5: Investigating the effects of the pairwise combinations of Glimepiride, Pancuronium Dibromide and Vinblastine Sulfate.** (A) CellTiter-Glo® luminescence assay was used to investigate the cell viability of (i) CMK and (ii) MV4-11 cell lines following 72h treatment with Glimepiride (0.5µM), Pancuronium Dibromide (0.5µM) and Vinblastine Sulfate (0.0005µM) as single agents and as pairwise combinations. (B) Flow cytometry analysis of Annexin V/PI positive cell population of (i) CMK and (ii) MV4-11 cell lines following 72h treatment with Glimepiride (0.5µM), Pancuronium Dibromide (0.5µM) and Vinblastine Sulfate (0.0005µM) as single agents and as pairwise combinations. *ns* = non-significant.

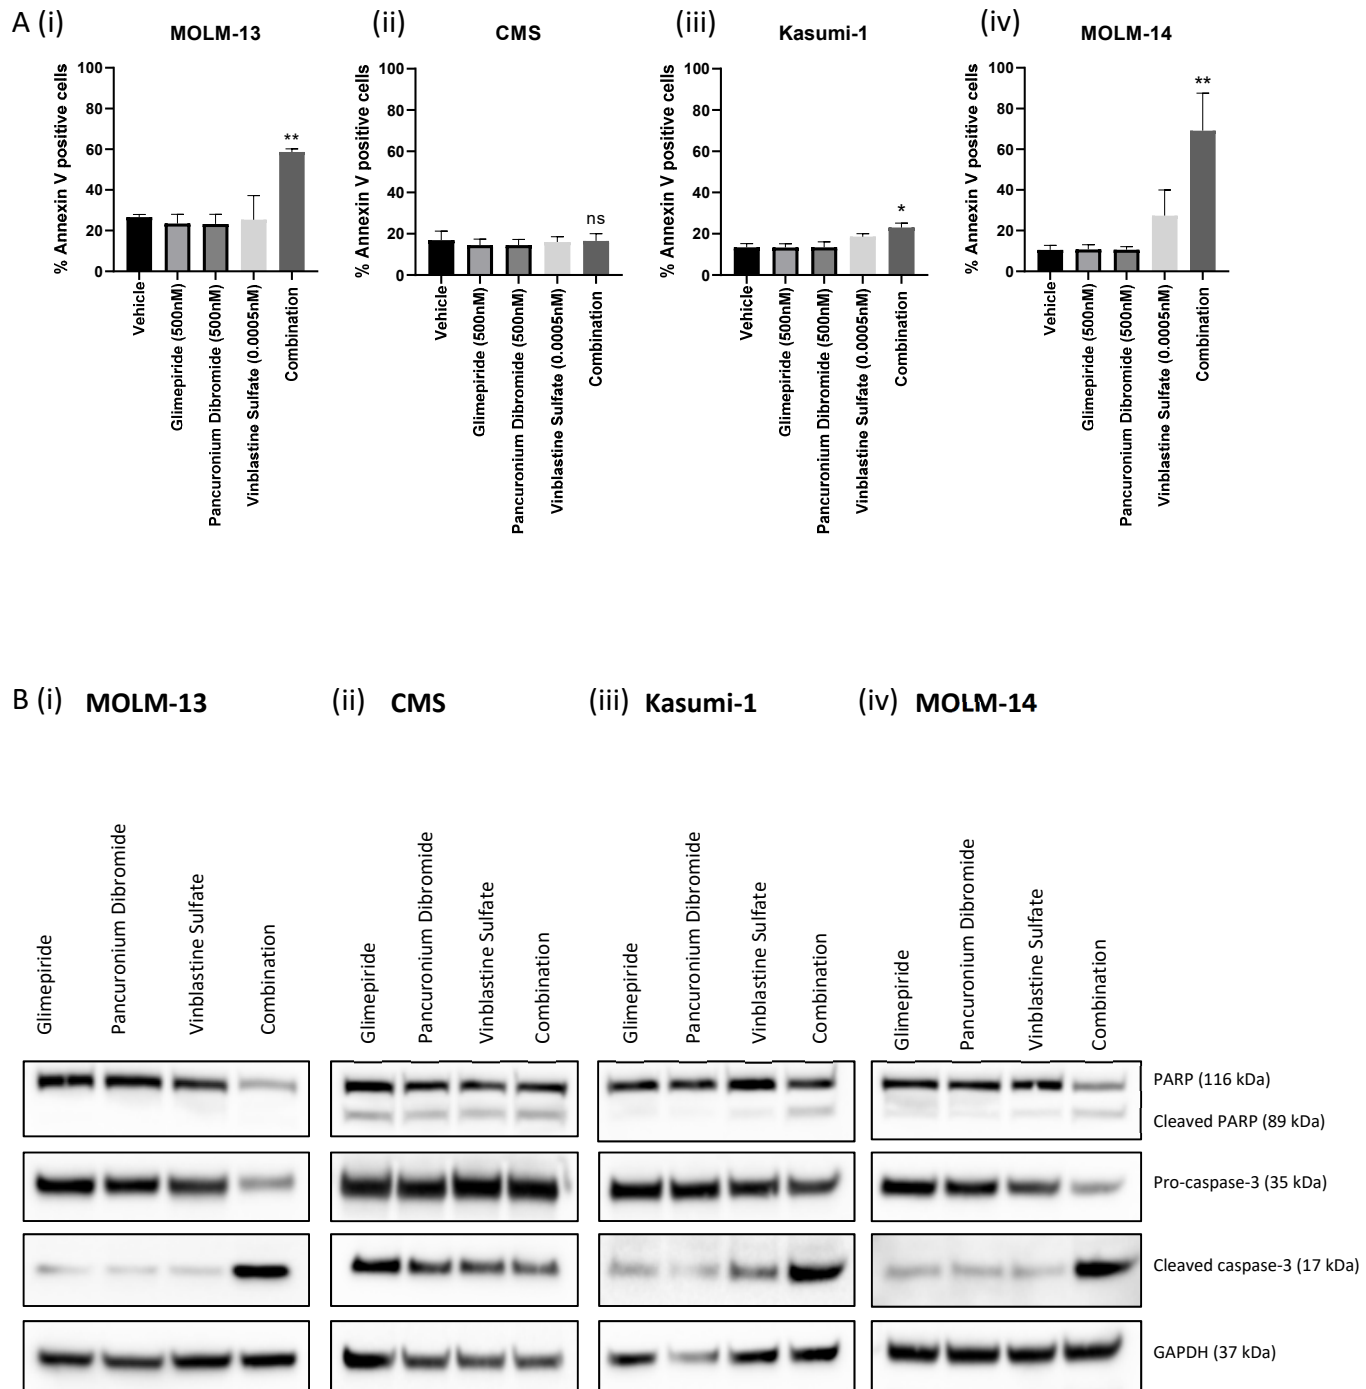

**Supplementary Figure S6:** Investigating the induction of apoptosis following treatment with glimepiride, pancuronium dibromide and vinblastine sulfate as a triple combination across multiple pediatric AML cell lines. (A) Flow cytometry analysis of Annexin V/PI positive cell population of (i) MOLM-13, (ii) CMS, (iii) Kasumi-1 and (iv) MOLM-14 cell lines following 72h treatment with Glimepiride (0.5 $\mu$ M), Pancuronium Dibromide (0.5 $\mu$ M) and Vinblastine Sulfate (0.0005 $\mu$ M) as single agents and as a triple combination. (B) Western blot analysis of PARP, Pro-Caspase-3, and cleaved Caspase-3 in the (i) MOLM-13, (ii) CMS, (iii) Kasumi-1 and (iv) MOLM-14 cell lines following 72h treatment with Glimepiride (0.5 $\mu$ M), Pancuronium Dibromide (0.5 $\mu$ M) and Vinblastine Sulfate (0.0005 $\mu$ M) as single agents and as a combination. GAPDH was used as a loading control. Results shown are representative of three independent experiments. *ns* = non-significant, \* =  $P < 0.05$ , \*\* =  $P < 0.01$ .
